# Supplementary material
Source: HighWire-hosted journal article supplement (http://molpharm.aspetjournals.org/highwire/filestream/76908/field_highwire_adjunct_files/3/SI_fig_4.pdf)
Supplement: SI_fig_4.pdf [file SI_fig_4.pdf]

## Glycine hinges with opposing actions at the acetylcholine receptor-channel transmitter binding site

Prasad Purohit and Anthony Auerbach

Department of Physiology and Biophysics, SUNY at Buffalo, Buffalo 14214, USA

**Molecular Pharmacology**

### Supplemental Figure 4

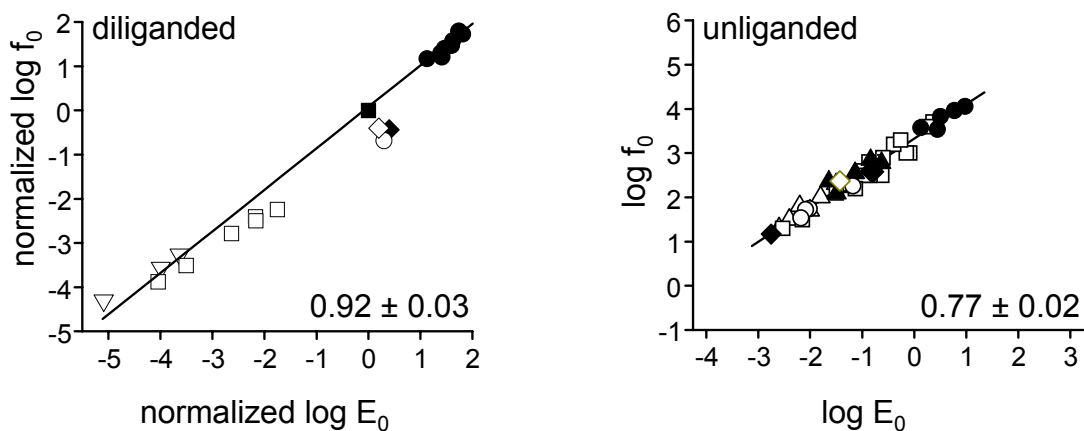

**Supplemental Figure 4.** Global R/E analyses of all loop B residues. Filled square, DYS (unliganded) and wt (liganded); open triangle:  $\alpha$ G147; filled triangles,  $\alpha$ T148; open squares,  $\alpha$ W149; filled diamonds,  $\alpha$ T150; open circle,  $\alpha$ Y151; open diamond,  $\alpha$ D152 and filled circles,  $\alpha$ G153. The  $\Phi$  value (determined from a linear fit; means $\pm$ sd) for diliganded gating is larger than for unliganded gating, which is evidence of an 'induced fit'.
